# Supplementary material for: Age‐stratified longitudinal study of Alzheimer's and vascular dementia patients
Source: PubMed Central journal article supplement — Alzheimers Dement. 2020 Apr 27;16(6):908–17. doi: 10.1002/alz.12091 (PMC7383608; doi:10.1002/alz.12091), 2020-04-27

Dementia in Alzheimer's disease    Vascular dementia    Dementia in other diseases    Unspecified dementia

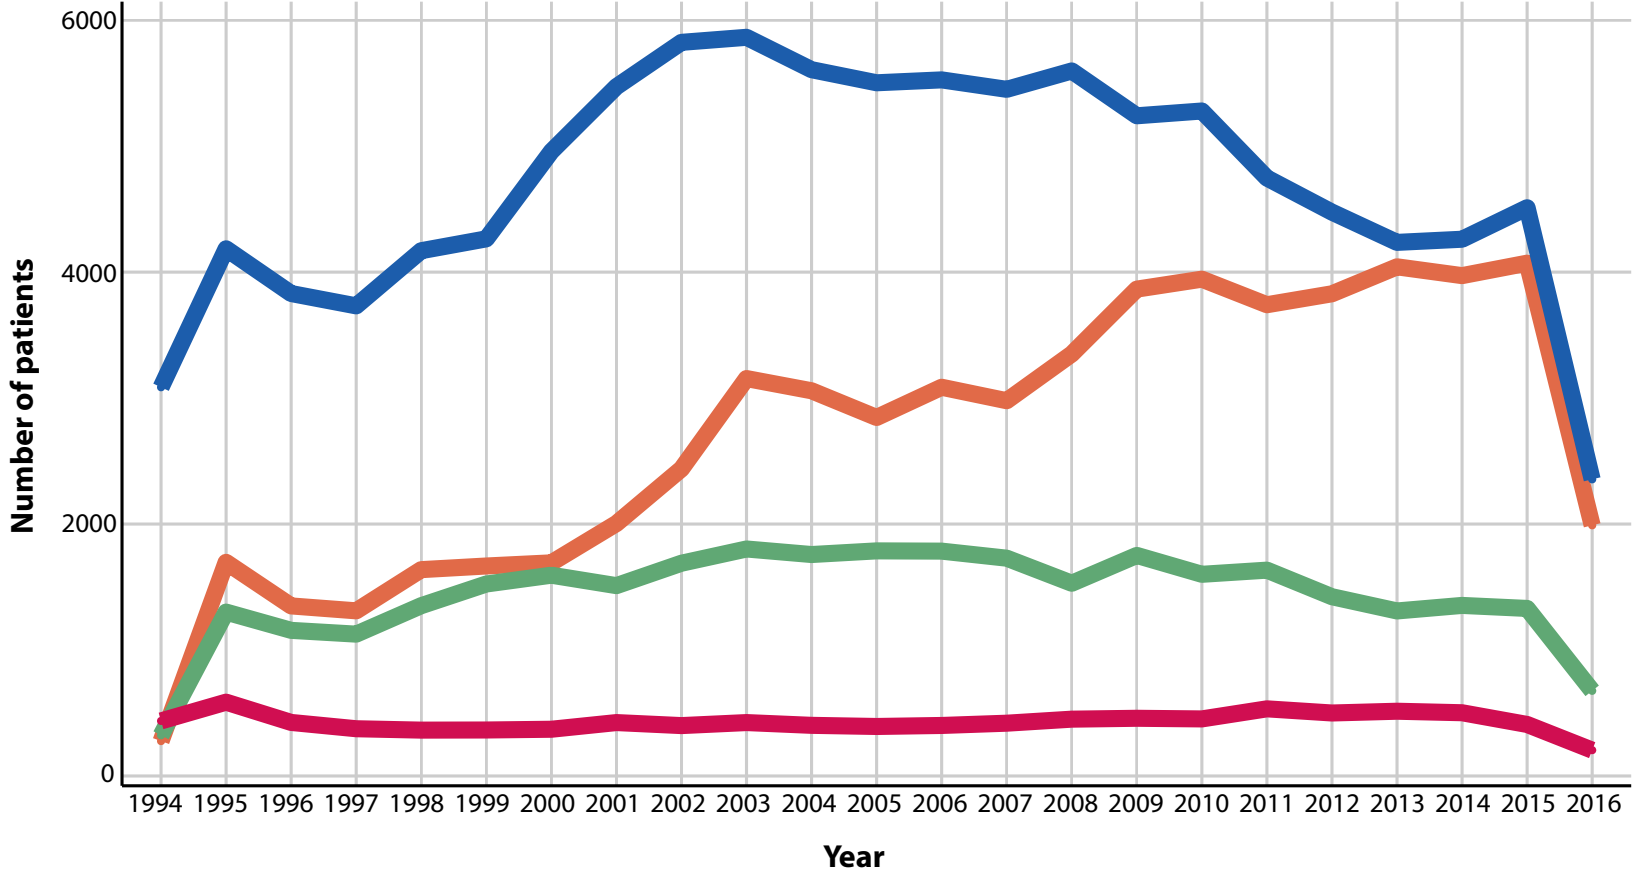

Supplement: ALZ-16-908-s003.pdf [file ALZ-16-908-s003.pdf]
