# Supplementary material for: Age‐stratified longitudinal study of Alzheimer's and vascular dementia patients
Source: PubMed Central journal article supplement — Alzheimers Dement. 2020 Apr 27;16(6):908–17. doi: 10.1002/alz.12091 (PMC7383608; doi:10.1002/alz.12091), 2020-04-27

Patients diagnosed with dementia between 40-50

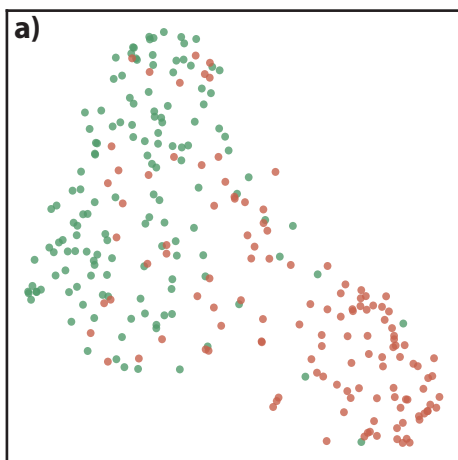

Patients diagnosed with dementia between 59-61

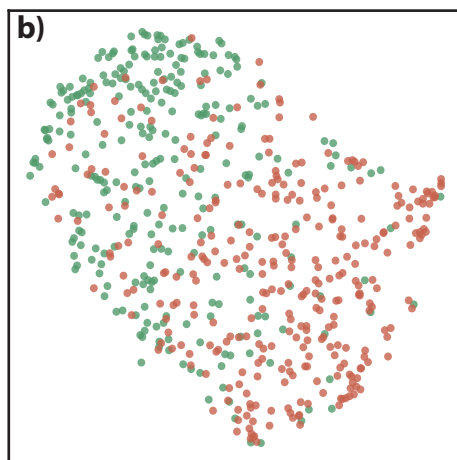

Patients diagnosed with dementia at 70

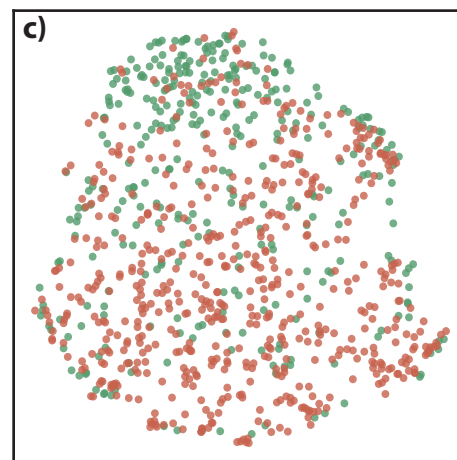

Patients diagnosed with dementia at 80

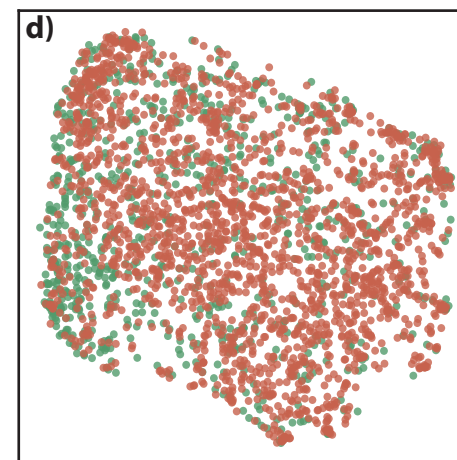

UMAP projection of dementia patients

- AD patients
- VaD patients

Clusters found with K-means clustering

- Cluster1
- Cluster2

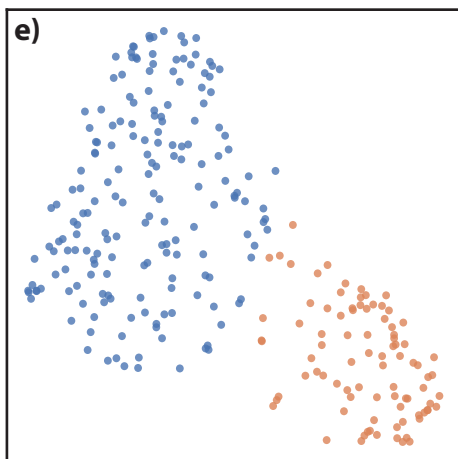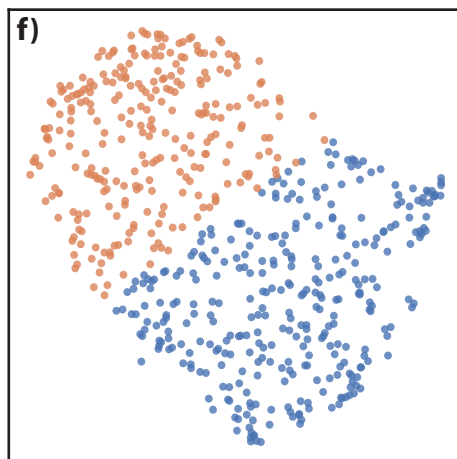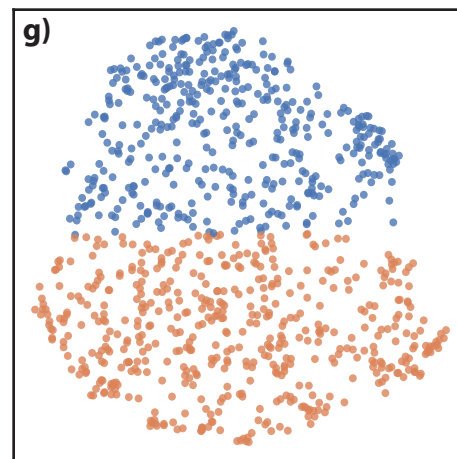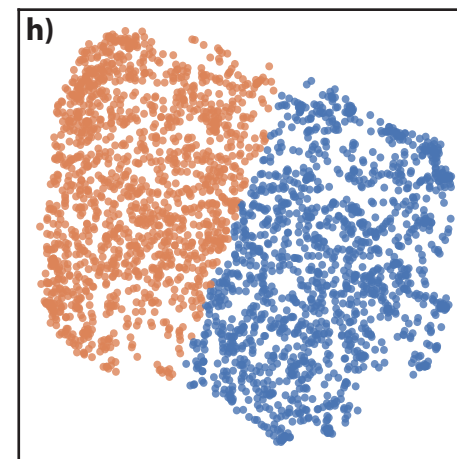

Diseases that are more prevalent in either VaD or AD patients

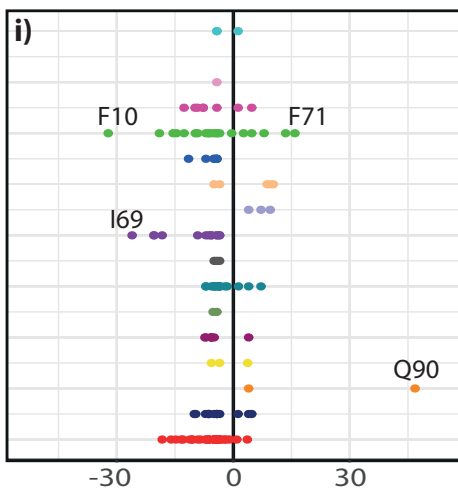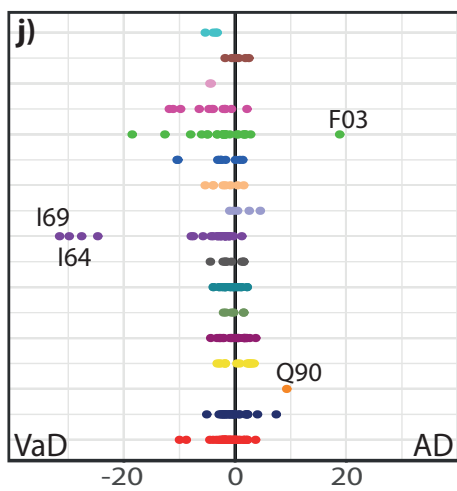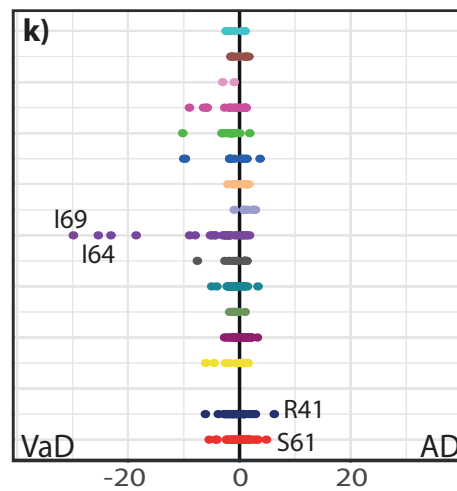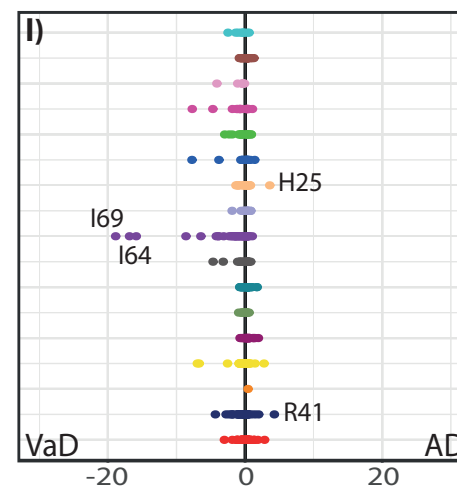

Supplement: ALZ-16-908-s007.pdf [file ALZ-16-908-s007.pdf]
