# Supplementary figures and images for: Age‐stratified longitudinal study of Alzheimer's and vascular dementia patients
Source: PubMed Central journal article supplement — Alzheimers Dement. 2020 Apr 27;16(6):908–17. doi: 10.1002/alz.12091 (PMC7383608; doi:10.1002/alz.12091), 2020-04-27

## Alzheimer's Disease dementia

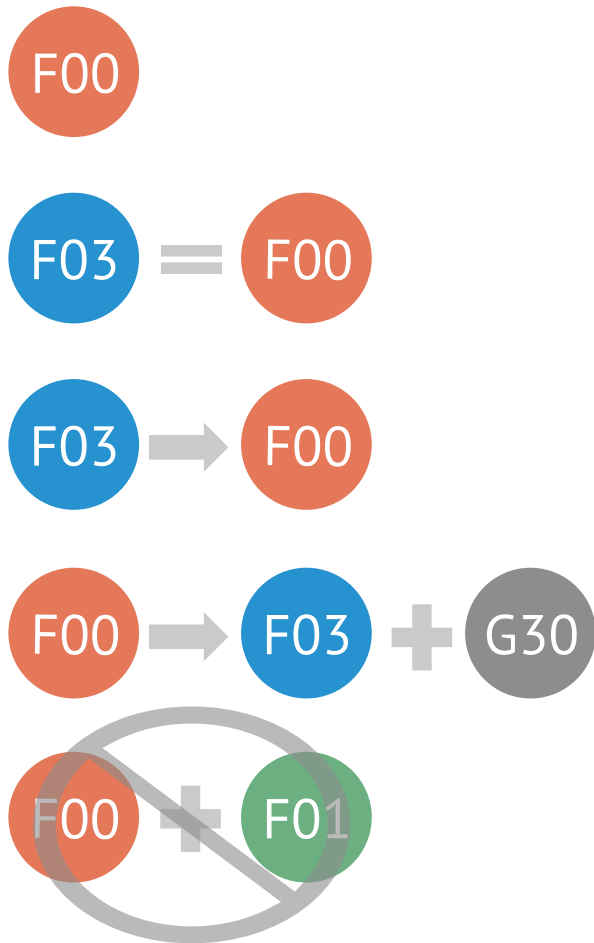

## Vascular dementia

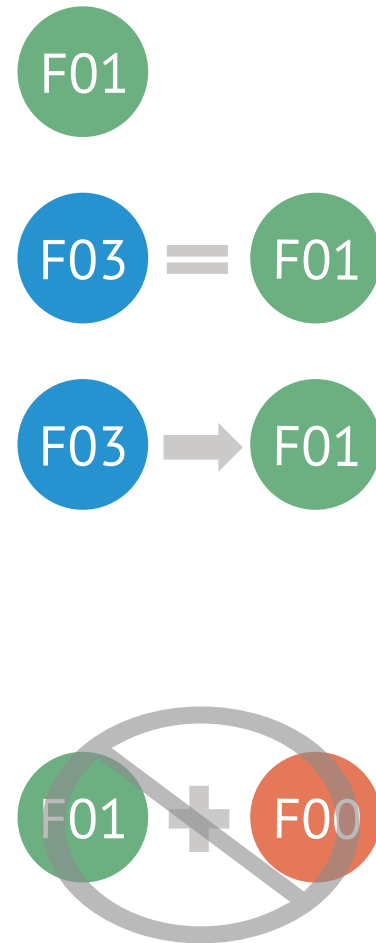

Supplement: ALZ-16-908-s001.pdf [file ALZ-16-908-s001.pdf]

## Comorbidities

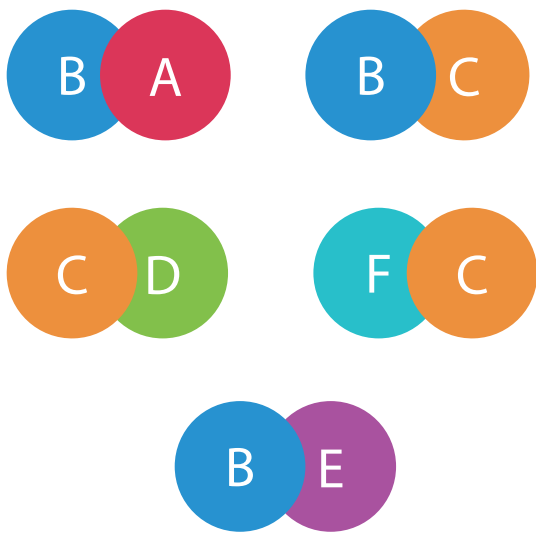

## Disease pairs

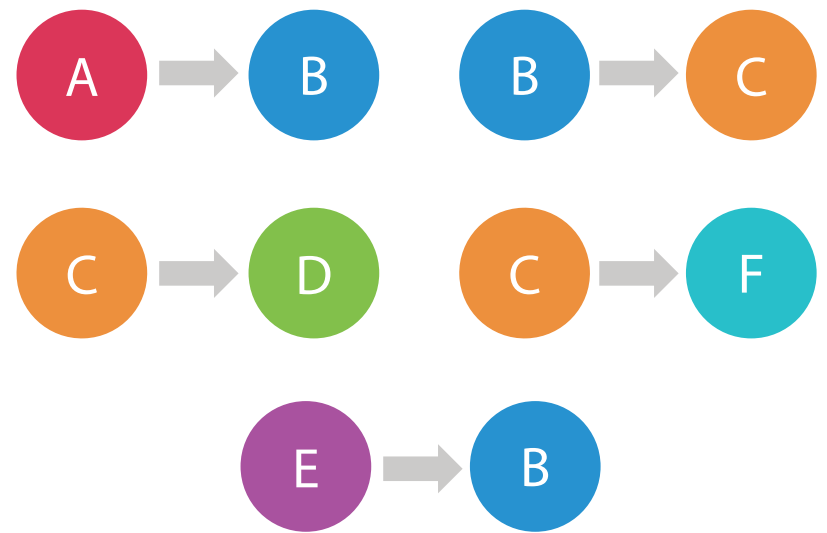

## Trajectories

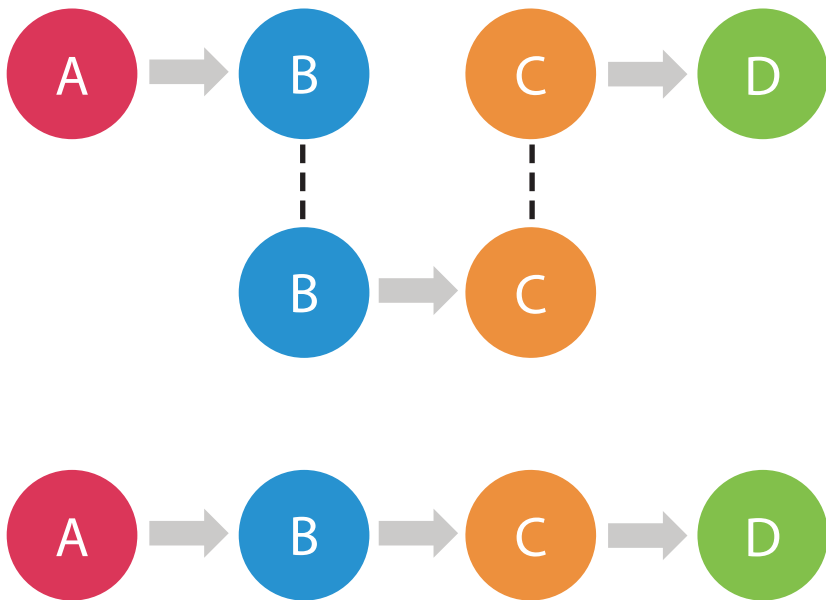

## Network

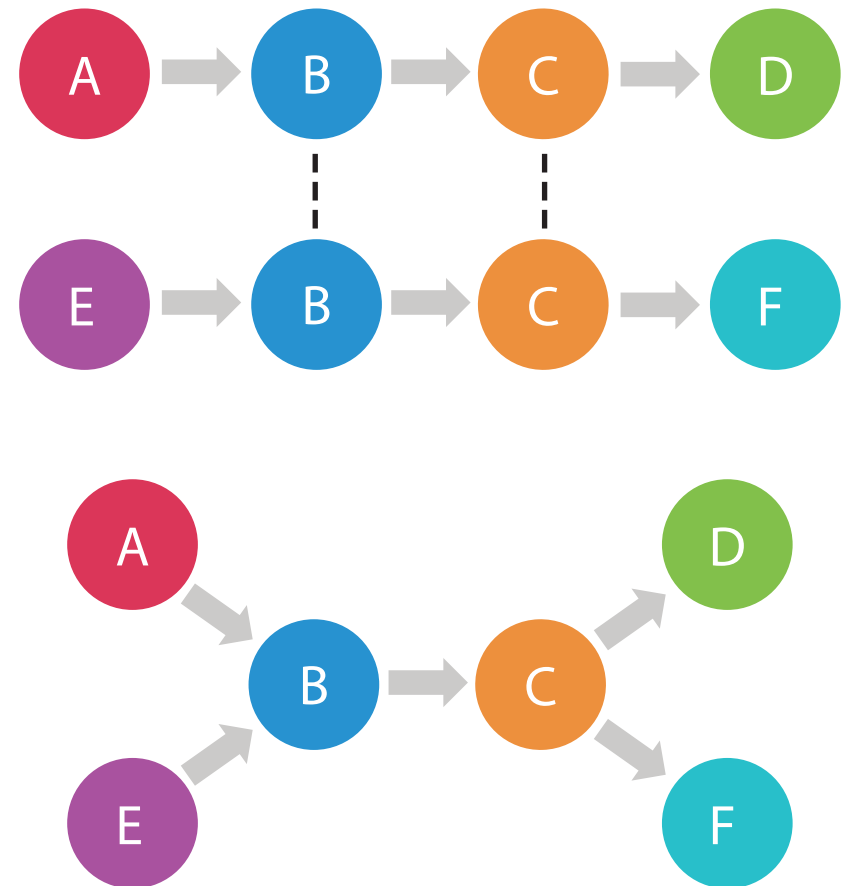

Supplement: ALZ-16-908-s002.pdf [file ALZ-16-908-s002.pdf]

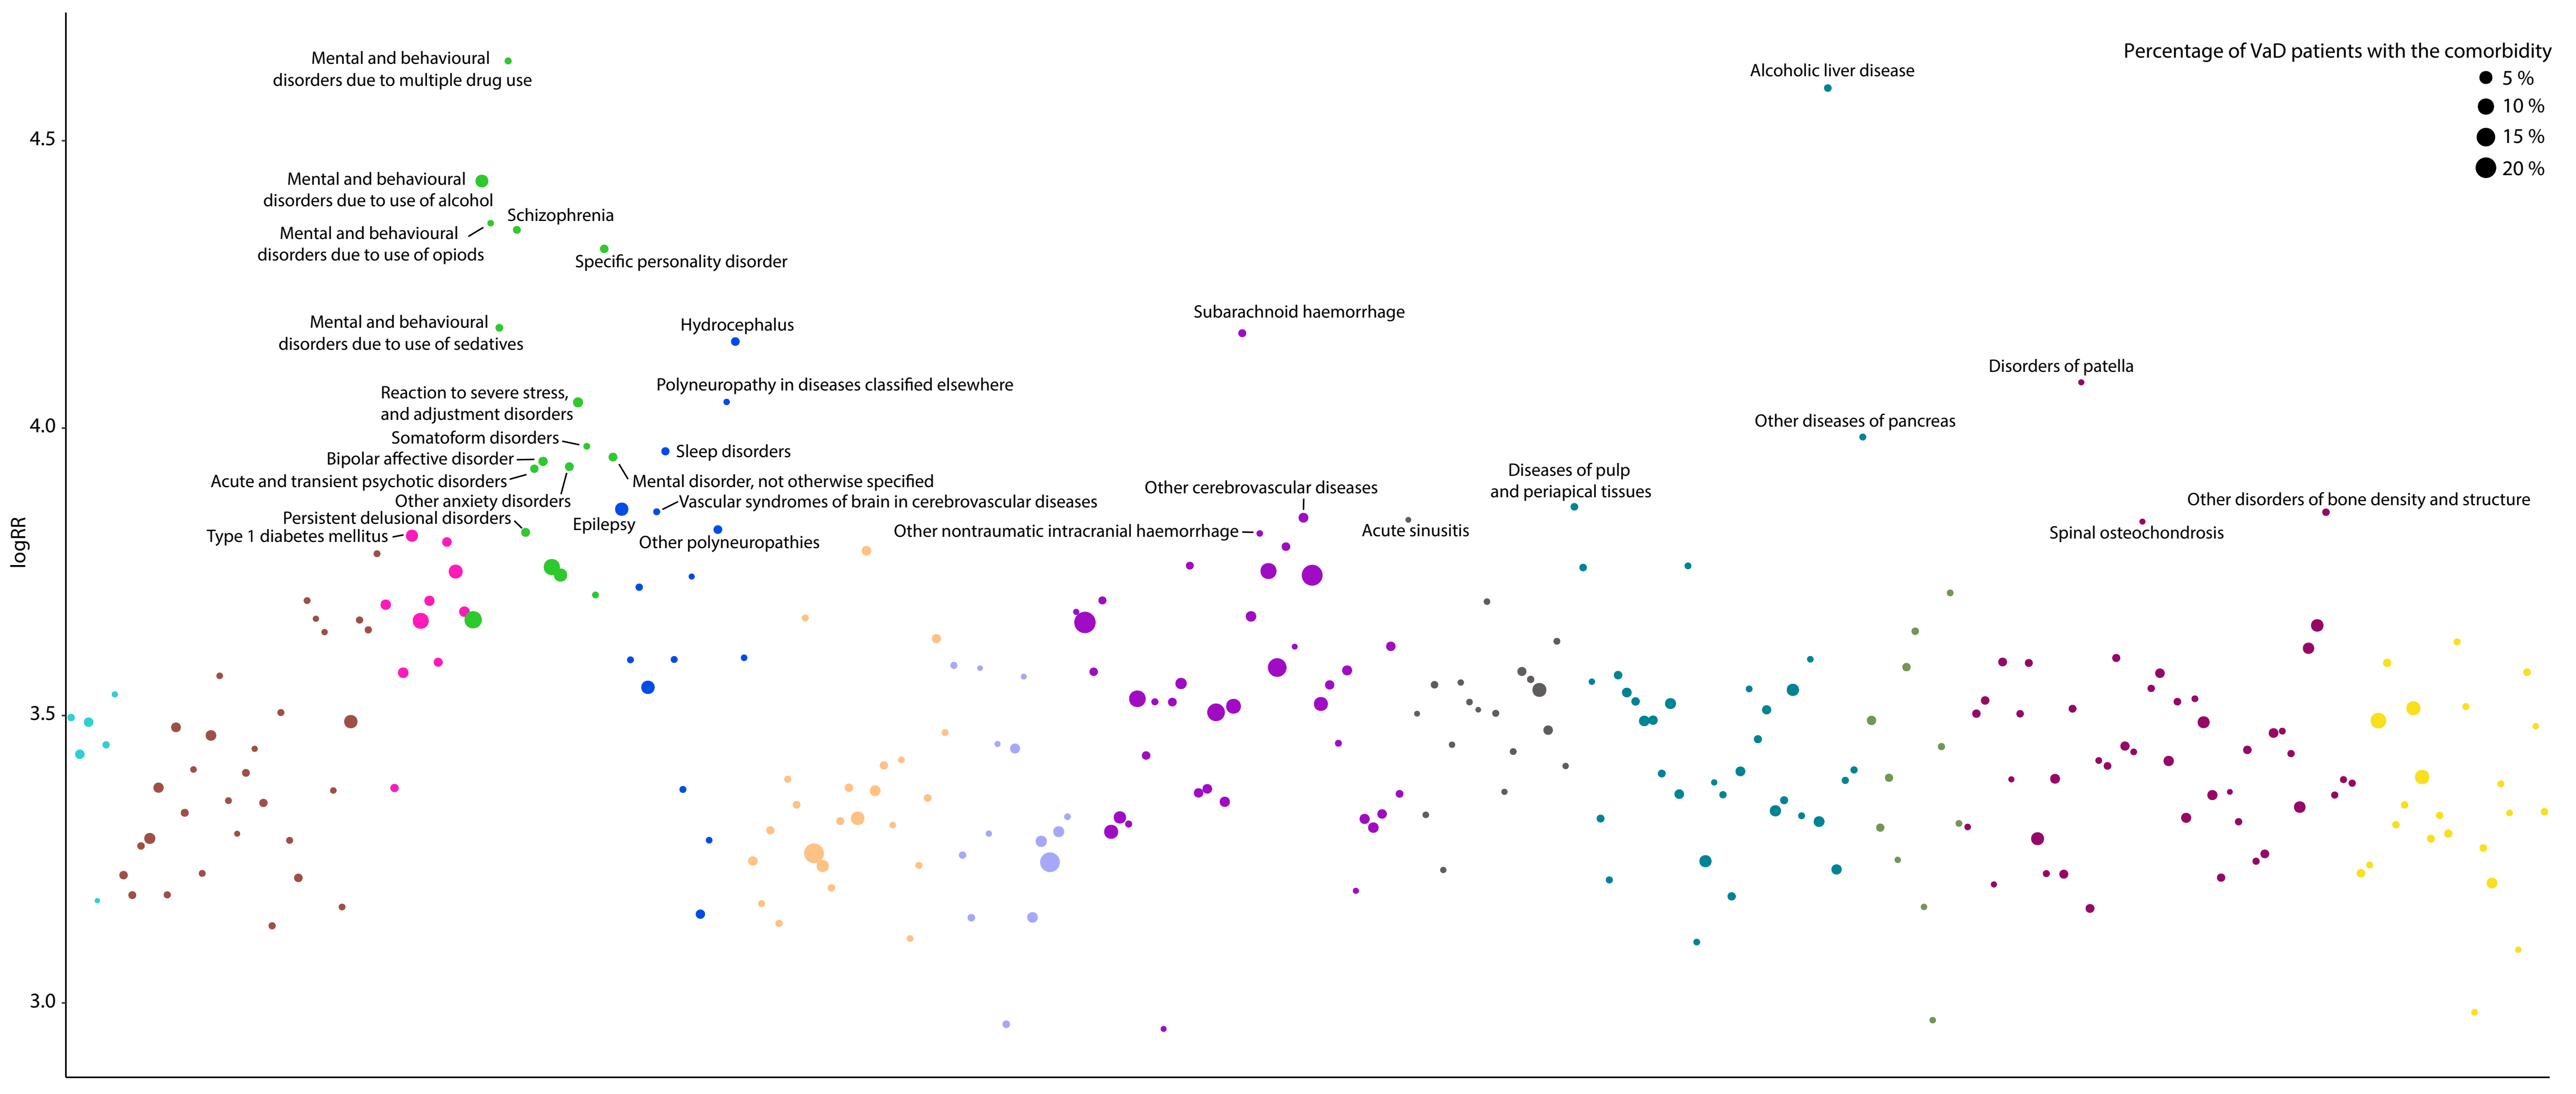

Supplement: ALZ-16-908-s005.pdf [file ALZ-16-908-s005.pdf]
